# Supplementary material for: Drone and Worker Brood Microclimates Are Regulated Differentially in Honey Bees, Apis mellifera
Source: PLoS One. 2016 Feb 16;11(2):e0148740. doi: 10.1371/journal.pone.0148740 (PMC4755576; doi:10.1371/journal.pone.0148740)
Supplement: S1 Table — (XLS) [file pone.0148740.s001.xls]

## Sheet: Exp1_T
Model Information
Data Set	WORK.HEX1
Dependent Variable	T
Covariance Structure	Compound Symmetry
Subject Effect	DateC(Stage)
Estimation Method	REML
Residual Variance Method	Profile
Fixed Effects SE Method	Model-Based
Degrees of Freedom Method	Between-Within
Number of Observations
Number of Observations Read	5183
Number of Observations Used	5183
Number of Observations Not Used	0
Covariance Parameter Estimates
Cov Parm	Subject	Estimate
CS	DateC(Stage)	0.01804
Residual		0.05302
Fit Statistics
-2 Res Log Likelihood	-335.9
AIC (smaller is better)	-331.9
AICC (smaller is better)	-331.9
BIC (smaller is better)	-329.8
Null Model Likelihood Ratio Test
DF	Chi-Square	Pr > ChiSq
1	1190.54	<.0001
S1 Table: Least squares means for honeybee brood temperature
Effect	Caste	Colony	Stage	Estimate	Standard Error	DF	t Value	Pr > |t|	Alpha	Lower	Upper
Colony		1		35.217	0.03499	40	1006.57	<.0001	0.05	35.1463	35.2877
Colony		2		35.3927	0.03499	40	1011.59	<.0001	0.05	35.322	35.4634
Colony		3		35.1092	0.03499	40	1003.49	<.0001	0.05	35.0385	35.1799
Caste(Colony)	Drone	1		35.1494	0.03567	48	985.29	<.0001	0.05	35.0777	35.2211
Caste(Colony)	Worker	1		35.2846	0.03567	48	989.08	<.0001	0.05	35.2128	35.3563
Caste(Colony)	Drone	2		35.1714	0.03567	48	985.91	<.0001	0.05	35.0997	35.2431
Caste(Colony)	Worker	2		35.6139	0.03567	48	998.31	<.0001	0.05	35.5422	35.6857
Caste(Colony)	Drone	3		35.3228	0.03567	48	990.15	<.0001	0.05	35.2511	35.3946
Caste(Colony)	Worker	3		34.8956	0.03567	48	978.18	<.0001	0.05	34.8238	34.9673
Stage(Caste*Colony)	Drone	1	Egg	35.4798	0.08129	48	436.47	<.0001	0.05	35.3163	35.6432
Stage(Caste*Colony)	Drone	1	Larva	35.1172	0.05692	48	617.01	<.0001	0.05	35.0027	35.2316
Stage(Caste*Colony)	Drone	1	Pupa	34.8512	0.04008	48	869.46	<.0001	0.05	34.7706	34.9318
Stage(Caste*Colony)	Drone	2	Egg	35.4331	0.08129	48	435.9	<.0001	0.05	35.2697	35.5966
Stage(Caste*Colony)	Drone	2	Larva	35.2531	0.05692	48	619.4	<.0001	0.05	35.1387	35.3676
Stage(Caste*Colony)	Drone	2	Pupa	34.828	0.04008	48	868.88	<.0001	0.05	34.7474	34.9086
Stage(Caste*Colony)	Drone	3	Egg	35.4919	0.08129	48	436.62	<.0001	0.05	35.3284	35.6553
Stage(Caste*Colony)	Drone	3	Larva	35.2891	0.05692	48	620.03	<.0001	0.05	35.1747	35.4036
Stage(Caste*Colony)	Drone	3	Pupa	35.1875	0.04009	48	877.79	<.0001	0.05	35.1069	35.2681
Stage(Caste*Colony)	Worker	1	Egg	35.6005	0.08129	48	437.96	<.0001	0.05	35.4371	35.764
Stage(Caste*Colony)	Worker	1	Larva	35.2355	0.05692	48	619.09	<.0001	0.05	35.121	35.3499
Stage(Caste*Colony)	Worker	1	Pupa	35.0177	0.04008	48	873.61	<.0001	0.05	34.9371	35.0983
Stage(Caste*Colony)	Worker	2	Egg	35.9261	0.08129	48	441.96	<.0001	0.05	35.7627	36.0896
Stage(Caste*Colony)	Worker	2	Larva	35.6528	0.05692	48	626.42	<.0001	0.05	35.5384	35.7672
Stage(Caste*Colony)	Worker	2	Pupa	35.2629	0.04008	48	879.73	<.0001	0.05	35.1823	35.3435
Stage(Caste*Colony)	Worker	3	Egg	35.0946	0.08129	48	431.73	<.0001	0.05	34.9311	35.258
Stage(Caste*Colony)	Worker	3	Larva	34.8011	0.05692	48	611.45	<.0001	0.05	34.6867	34.9155
Stage(Caste*Colony)	Worker	3	Pupa	34.7911	0.04008	48	867.95	<.0001	0.05	34.7105	34.8717
