# Supplementary material for: Drone and Worker Brood Microclimates Are Regulated Differentially in Honey Bees, Apis mellifera
Source: PLoS One. 2016 Feb 16;11(2):e0148740. doi: 10.1371/journal.pone.0148740 (PMC4755576; doi:10.1371/journal.pone.0148740)
Supplement: S2 Table — (XLS) [file pone.0148740.s002.xls]

## Sheet: Exp1_T
Model Information
Data Set	WORK.HEX1
Dependent Variable	T
Covariance Structure	Compound Symmetry
Subject Effect	DateC(Stage)
Estimation Method	REML
Residual Variance Method	Profile
Fixed Effects SE Method	Model-Based
Degrees of Freedom Method	Between-Within
Number of Observations
Number of Observations Read	5183
Number of Observations Used	5183
Number of Observations Not Used	0
Covariance Parameter Estimates
Cov Parm	Subject	Estimate
CS	DateC(Stage)	0.01804
Residual		0.05302
Fit Statistics
-2 Res Log Likelihood	-335.9
AIC (smaller is better)	-331.9
AICC (smaller is better)	-331.9
BIC (smaller is better)	-329.8
Null Model Likelihood Ratio Test
DF	Chi-Square	Pr > ChiSq
1	1190.54	<.0001
S2 Table: Stage temperature differences of least squares means within caste and colony of honeybee brood
	Colony 1		Colony 2		Colony 3
Effects	Mean	p-value	Mean	p-value	Mean	p-value
Caste within Colony
Drone - Worker	-0.1352	<.0001	-0.4425	<.0001	0.4273	<.0001
Stage within Caste and Colony
Drone
Egg - Larva	0.3626	0.0006	0.18	0.076	0.2027	0.0466
Egg - Pupa	0.6286	<.0001	0.6051	<.0001	0.3044	0.0015
Larva - Pupa	0.266	0.0004	0.4251	<.0001	0.1016	0.1508
Worker
Egg - Larva	0.365	0.0006	0.2733	0.0083	0.2935	0.0048
Egg - Pupa	0.5828	<.0001	0.6632	<.0001	0.3035	0.0016
Larva - Pupa	0.2178	0.003	0.3899	<.0001	0.01004	0.886
Stage within Colony by Caste
Drone Egg - Worker Egg	-0.1207	0.0007	-0.493	<.0001	0.3973	<.0001
Drone Larva - Worker Larva	-0.1183	<.0001	-0.3997	<.0001	0.488	<.0001
Drone Pupa - Worker Pupa	-0.1664	<.0001	-0.4349	<.0001	0.3964	<.0001
