# Supplementary material for: Drone and Worker Brood Microclimates Are Regulated Differentially in Honey Bees, Apis mellifera
Source: PLoS One. 2016 Feb 16;11(2):e0148740. doi: 10.1371/journal.pone.0148740 (PMC4755576; doi:10.1371/journal.pone.0148740)
Supplement: S3 Table — (XLS) [file pone.0148740.s003.xls]

## Sheet: Exp1_sRH
Model Information
Data Set	WORK.HEX1
Dependent Variable	sRH
Covariance Structure	Compound Symmetry
Subject Effect	DateC(Stage)
Estimation Method	REML
Residual Variance Method	Profile
Fixed Effects SE Method	Model-Based
Degrees of Freedom Method	Between-Within
Number of Observations
Number of Observations Read	5183
Number of Observations Used	5183
Number of Observations Not Used	0
Covariance Parameter Estimates
Cov Parm	Subject	Estimate
CS	DateC(Stage)	0.00047
Residual		0.001917
Fit Statistics
-2 Res Log Likelihood	-17488.7
AIC (smaller is better)	-17484.7
AICC (smaller is better)	-17484.7
BIC (smaller is better)	-17482.6
Null Model Likelihood Ratio Test
DF	Chi-Square	Pr > ChiSq
1	881.18	<.0001
S3 Table: Least squares means for honeybee brood sRH
Effect	Caste	Colony	Stage	Estimate	Standard Error	DF	t Value	Pr > |t|	Alpha	Lower	Upper
Colony		1		0.6002	0.005698	40	105.34	<.0001	0.05	0.5887	0.6117
Colony		2		0.7476	0.005698	40	131.22	<.0001	0.05	0.7361	0.7592
Colony		3		0.6428	0.005698	40	112.82	<.0001	0.05	0.6313	0.6543
Caste(Colony)	Drone	1		0.5517	0.00585	48	94.31	<.0001	0.05	0.5399	0.5635
Caste(Colony)	Worker	1		0.6487	0.00585	48	110.9	<.0001	0.05	0.637	0.6605
Caste(Colony)	Drone	2		0.8015	0.00585	48	137.02	<.0001	0.05	0.7898	0.8133
Caste(Colony)	Worker	2		0.6937	0.00585	48	118.59	<.0001	0.05	0.682	0.7055
Caste(Colony)	Drone	3		0.6381	0.00585	48	109.08	<.0001	0.05	0.6263	0.6498
Caste(Colony)	Worker	3		0.6475	0.00585	48	110.7	<.0001	0.05	0.6358	0.6593
Stage(Caste*Colony)	Drone	1	Egg	0.5719	0.01335	48	42.84	<.0001	0.05	0.5451	0.5988
Stage(Caste*Colony)	Drone	1	Larva	0.5619	0.009316	48	60.31	<.0001	0.05	0.5432	0.5806
Stage(Caste*Colony)	Drone	1	Pupa	0.5213	0.006552	48	79.56	<.0001	0.05	0.5081	0.5344
Stage(Caste*Colony)	Drone	2	Egg	0.8077	0.01335	48	60.5	<.0001	0.05	0.7808	0.8345
Stage(Caste*Colony)	Drone	2	Larva	0.8278	0.009316	48	88.85	<.0001	0.05	0.809	0.8465
Stage(Caste*Colony)	Drone	2	Pupa	0.7692	0.006552	48	117.4	<.0001	0.05	0.756	0.7824
Stage(Caste*Colony)	Drone	3	Egg	0.6319	0.01335	48	47.33	<.0001	0.05	0.6051	0.6588
Stage(Caste*Colony)	Drone	3	Larva	0.6715	0.009316	48	72.08	<.0001	0.05	0.6528	0.6902
Stage(Caste*Colony)	Drone	3	Pupa	0.6107	0.006553	48	93.2	<.0001	0.05	0.5976	0.6239
Stage(Caste*Colony)	Worker	1	Egg	0.6809	0.01335	48	51	<.0001	0.05	0.6541	0.7078
Stage(Caste*Colony)	Worker	1	Larva	0.6473	0.009316	48	69.48	<.0001	0.05	0.6286	0.666
Stage(Caste*Colony)	Worker	1	Pupa	0.618	0.006552	48	94.32	<.0001	0.05	0.6048	0.6312
Stage(Caste*Colony)	Worker	2	Egg	0.7482	0.01335	48	56.04	<.0001	0.05	0.7213	0.775
Stage(Caste*Colony)	Worker	2	Larva	0.7006	0.009316	48	75.2	<.0001	0.05	0.6819	0.7193
Stage(Caste*Colony)	Worker	2	Pupa	0.6324	0.006552	48	96.52	<.0001	0.05	0.6193	0.6456
Stage(Caste*Colony)	Worker	3	Egg	0.6635	0.01335	48	49.7	<.0001	0.05	0.6366	0.6903
Stage(Caste*Colony)	Worker	3	Larva	0.6378	0.009316	48	68.47	<.0001	0.05	0.6191	0.6566
Stage(Caste*Colony)	Worker	3	Pupa	0.6413	0.006552	48	97.88	<.0001	0.05	0.6282	0.6545
