# Supplementary material for: Drone and Worker Brood Microclimates Are Regulated Differentially in Honey Bees, Apis mellifera
Source: PLoS One. 2016 Feb 16;11(2):e0148740. doi: 10.1371/journal.pone.0148740 (PMC4755576; doi:10.1371/journal.pone.0148740)
Supplement: S4 Table — (XLS) [file pone.0148740.s004.xls]

## Sheet: Exp1_sRH
Model Information
Data Set	WORK.HEX1
Dependent Variable	sRH
Covariance Structure	Compound Symmetry
Subject Effect	DateC(Stage)
Estimation Method	REML
Residual Variance Method	Profile
Fixed Effects SE Method	Model-Based
Degrees of Freedom Method	Between-Within
Number of Observations
Number of Observations Read	5183
Number of Observations Used	5183
Number of Observations Not Used	0
Covariance Parameter Estimates
Cov Parm	Subject	Estimate
CS	DateC(Stage)	0.00047
Residual		0.001917
Fit Statistics
-2 Res Log Likelihood	-17488.7
AIC (smaller is better)	-17484.7
AICC (smaller is better)	-17484.7
BIC (smaller is better)	-17482.6
Null Model Likelihood Ratio Test
DF	Chi-Square	Pr > ChiSq
1	881.18	<.0001
S4 Table: Stage sRH differences of least squares means within caste and colony of honeybee brood
	Colony 1		Colony 2		Colony 3
Effects	Mean	p-value	Mean	p-value	Mean	p-value
Caste within Colony
Drone - Worker	-0.09704	<.0001	0.1078	<.0001	-0.00949	0.0008
Stage within Caste and Colony
Drone
Egg - Larva	0.01006	0.5396	-0.0201	0.2229	-0.03958	0.0188
Egg - Pupa	0.05068	0.0013	0.03849	0.0127	0.02121	0.1604
Larva - Pupa	0.04062	0.0008	0.05859	<.0001	0.06079	<.0001
Worker
Egg - Larva	0.03362	0.0443	0.04756	0.0053	0.02563	0.1219
Egg - Pupa	0.06293	0.0001	0.1157	<.0001	0.02214	0.1432
Larva - Pupa	0.0293	0.0132	0.06819	<.0001	-0.0035	0.7602
Stage within Colony by Caste
Drone Egg - Worker Egg	-0.109	<.0001	0.0595	<.0001	-0.03154	<.0001
Drone Larva - Worker Larva	-0.08542	<.0001	0.1272	<.0001	0.03368	<.0001
Drone Pupa - Worker Pupa	-0.09673	<.0001	0.1368	<.0001	-0.03061	<.0001
