# Supplementary material for: Drone and Worker Brood Microclimates Are Regulated Differentially in Honey Bees, Apis mellifera
Source: PLoS One. 2016 Feb 16;11(2):e0148740. doi: 10.1371/journal.pone.0148740 (PMC4755576; doi:10.1371/journal.pone.0148740)
Supplement: S5 Table — (XLS) [file pone.0148740.s005.xls]

## Sheet: Exp2_sRH
Model Information
Data Set	WORK.HEX2
Dependent Variable	sRH
Covariance Structure	Compound Symmetry
Subject Effect	Day(Treatment)
Estimation Method	REML
Residual Variance Method	Profile
Fixed Effects SE Method	Model-Based
Degrees of Freedom Method	Between-Within
Number of Observations
Number of Observations Read	2160
Number of Observations Used	2160
Number of Observations Not Used	0
Covariance Parameter Estimates
Cov Parm	Subject	Estimate
CS	Day(Treatment)	0.00088
Residual		0.001656
Fit Statistics
-2 Res Log Likelihood	-7618.9
AIC (smaller is better)	-7614.9
AICC (smaller is better)	-7614.9
BIC (smaller is better)	-7613.5
Null Model Likelihood Ratio Test
DF	Chi-Square	Pr > ChiSq
1	712.61	<.0001
S5 Table: Tests of fixed effects for honeybee brood sRH in contribution test of honey combs to RH regulation
Effect	Num DF	Den DF	F Value	Pr > F
Treatment	2	12	354.99	<.0001
